# Supplementary material for: Long-term Prediction of Cardiovascular Outcomes by Circulating CD34+ and CD34+CD133+ Stem Cells in Patients With Type 2 Diabetes
Source: Oxford University Press journal article supplement (doi:10.2337/dc16-1755), 2016-11-04

SUPPLEMENTARY DATA

**Supplementary Figure S1. Representative FACS plots.** Representative analyses of circulating stem/progenitor cell identification and enumeration from a patient without (A) and with (B) cardiovascular events at follow-up. After gating lymphocytes and monocytes in the FSC versus SSC morphologic plot (where  $5 \times 10^5$  events are shown), total CD34<sup>+</sup> cells were identified and scored (a parallel analysis was performed for total CD133<sup>+</sup> cells). Gated CD34<sup>+</sup> cells were then examined for expression of CD133 and KDR. Here, CD34<sup>+</sup>CD133<sup>+</sup> cell count derive from the sum of CD34<sup>+</sup>CD133<sup>+</sup>KDR<sup>+</sup> and CD34<sup>+</sup>CD133<sup>+</sup>KDR<sup>-</sup> events.

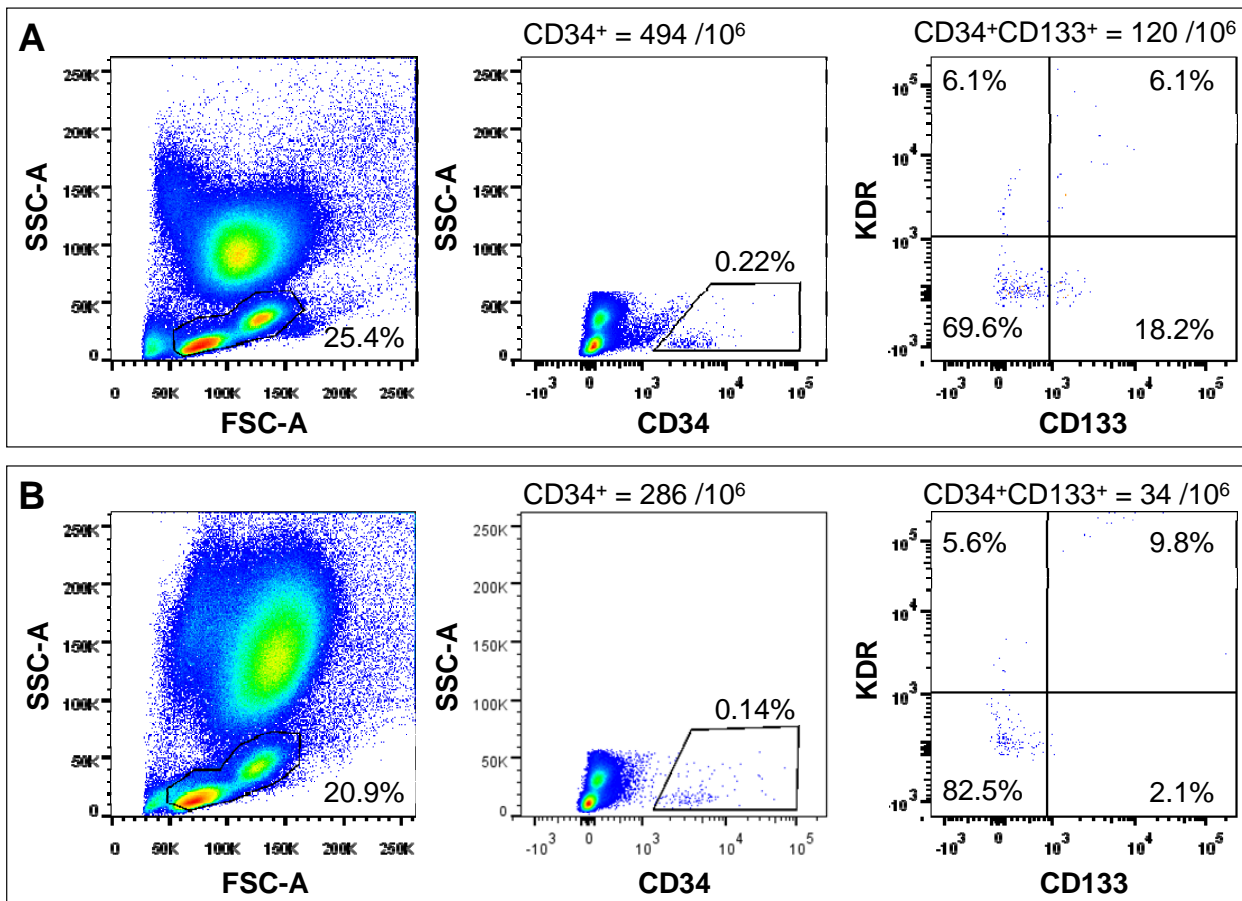

SUPPLEMENTARY DATA

**Supplementary Figure S2. Absolute progenitor cell levels and cardiovascular outcomes.** A) Progenitor cell levels (mean  $\pm$  standard error) in patients divided into those who developed or not developed an event (all events, 3-point MACE, 4-point MACE) at follow-up. B) Annual incidence of all events, 3-point MACE, and 4-point MACE in patients divided according to high or low stem/progenitor cell levels based on the median value. \* $p < 0.05$ ; \*\*significant after BH correction.

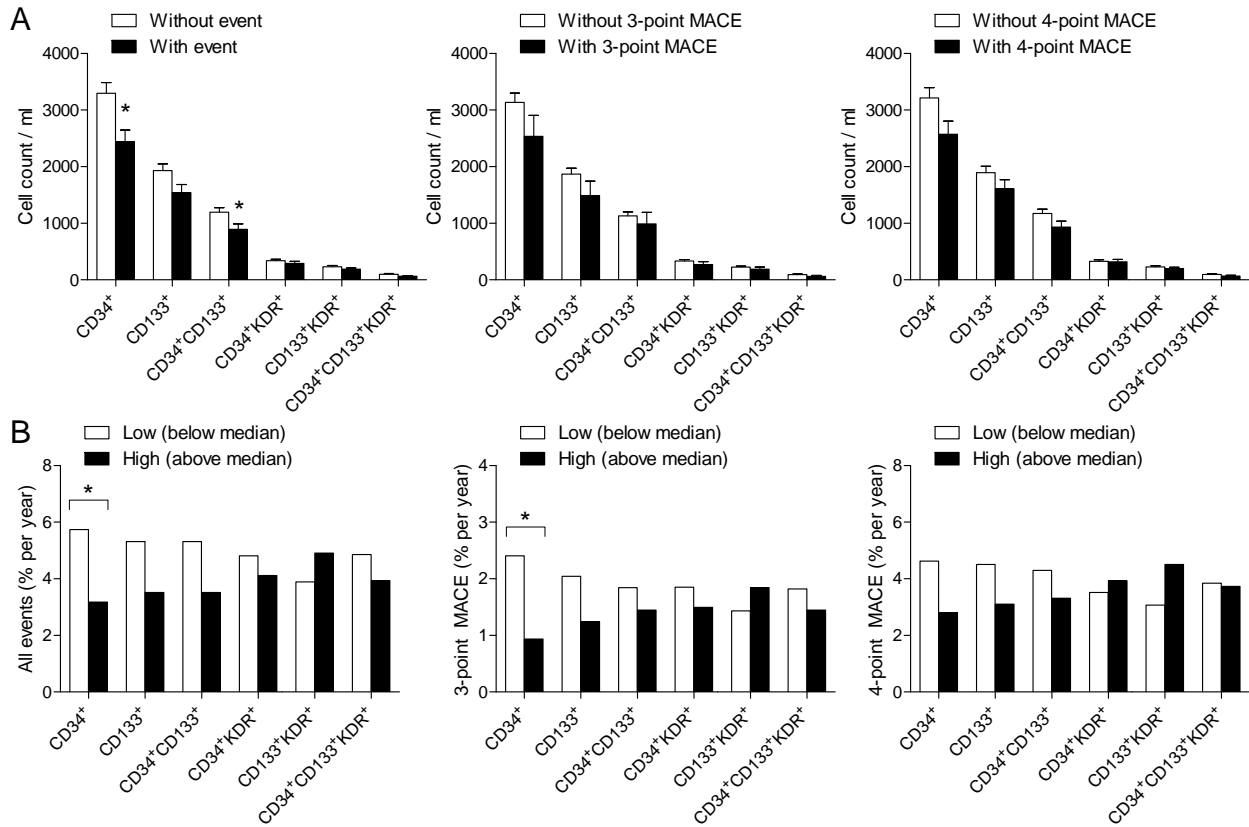

Supplement: dc161755supplementarydata.pdf [file dc161755supplementarydata.pdf]
